# Supplementary material for: Pairwise growth competitions identify relative fitness relationships among artemisinin resistant Plasmodium falciparum field isolates
Source: PubMed Central journal article supplement (PMC6714446; doi:10.1186/s12936-019-2934-4), 2019-08-28

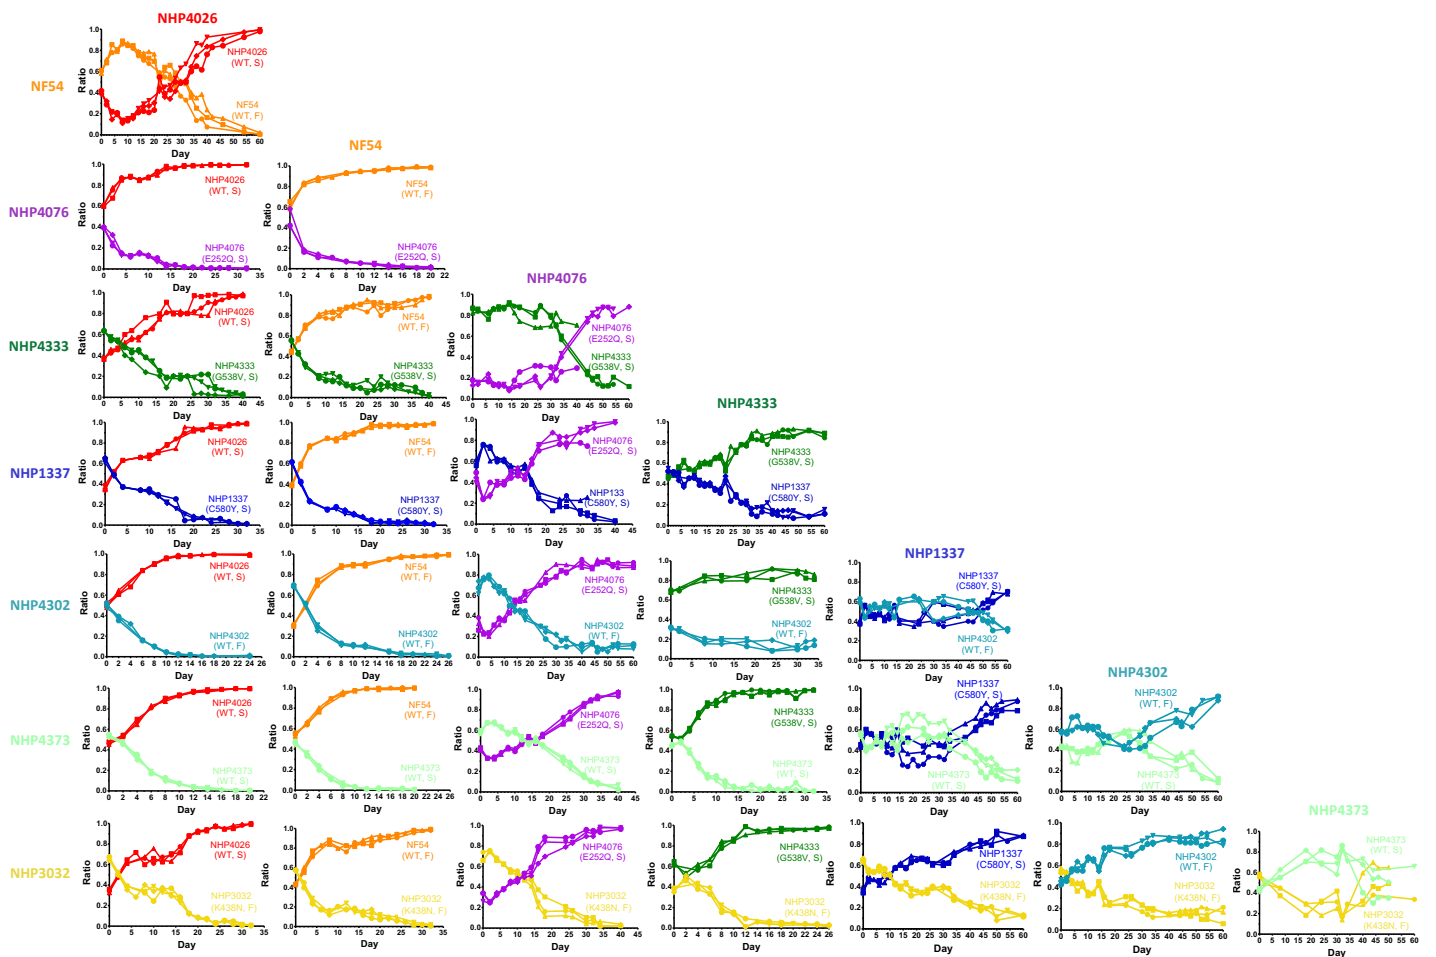

Supplement: 12936_2019_2934_MOESM6_ESM.pdf [file 12936_2019_2934_MOESM6_ESM.pdf]
