# Supplementary material for: Pairwise growth competitions identify relative fitness relationships among artemisinin resistant Plasmodium falciparum field isolates
Source: Springer Nature journal article supplement (doi:10.1186/s12936-019-2934-4), 2019-08-28
Supplement: MOESM1 [file 17111792]

| <b>A</b> | MS marker    | Forward Primer           | Reverse Primer           | Tm | CEQ Fragment Size for NHP4026 | CEQ Fragment Size for NF54 | CEQ Fragment Size for NHP4076 | CEQ Fragment Size for NHP4333 | CEQ Fragment Size for NHP1337 | CEQ Fragment Size for NHP4302 | CEQ Fragment Size for NHP4373 | CEQ Fragment Size for NHP3032 |
|----------|--------------|--------------------------|--------------------------|----|-------------------------------|----------------------------|-------------------------------|-------------------------------|-------------------------------|-------------------------------|-------------------------------|-------------------------------|
|          | <b>TA119</b> | TCCTCGATTATATTA<br>TTGCA | TAATACATTCCCATT<br>AGATG | 53 | 223                           | 241                        | 235                           | 229                           | 230                           | 238                           | 230                           | 230                           |
|          | <b>TA81</b>  | TGGACAAATGGGAA<br>AGGAT  | TTTCACACAACACA<br>GGATT  | 53 | 135                           | 120                        | 126                           | 129                           | 122                           | 119                           | 116                           | 116                           |
|          | <b>TA77</b>  | AAGCAAAAGAAAAT<br>AAGGAA | GCACATAGTTGGTT<br>CTCAC  | 53 | 197                           | 197                        | 197                           | -                             | -                             | 197                           | 197                           | 206                           |
|          | <b>TA62</b>  | ATTATAGTGAAGAT<br>AGCCA  | TTACTTTCATCACTA<br>TTTG  | 48 | 164                           | 173                        | 164                           | -                             | 164                           | 164                           | 164                           | 164                           |

**B**

**NHP4026**

|                |       |             |                |                |                |                |                |  |  |  |  |  |
|----------------|-------|-------------|----------------|----------------|----------------|----------------|----------------|--|--|--|--|--|
| <b>NF54</b>    | TA119 | <b>NF54</b> |                |                |                |                |                |  |  |  |  |  |
| <b>NHP4076</b> | TA119 | TA119       | <b>NHP4076</b> |                |                |                |                |  |  |  |  |  |
| <b>NHP4333</b> | TA119 | TA119       | TA119          | <b>NHP4333</b> |                |                |                |  |  |  |  |  |
| <b>NHP1337</b> | TA119 | TA119       | TA119          | TA81           | <b>NHP1337</b> |                |                |  |  |  |  |  |
| <b>NHP4302</b> | TA119 | TA62        | TA81           | TA119          | TA119          | <b>NHP4302</b> |                |  |  |  |  |  |
| <b>NHP4373</b> | TA119 | TA119       | TA81           | TA81           | TA81           | TA119          | <b>NHP4373</b> |  |  |  |  |  |
| <b>NHP3032</b> | TA119 | TA119       | TA81           | TA81           | TA81           | TA119          | TA77           |  |  |  |  |  |
