# Supplementary material for: Pairwise growth competitions identify relative fitness relationships among artemisinin resistant Plasmodium falciparum field isolates
Source: Springer Nature journal article supplement (doi:10.1186/s12936-019-2934-4), 2019-08-28

# A NHP4026 vs. NF54: biological replicates

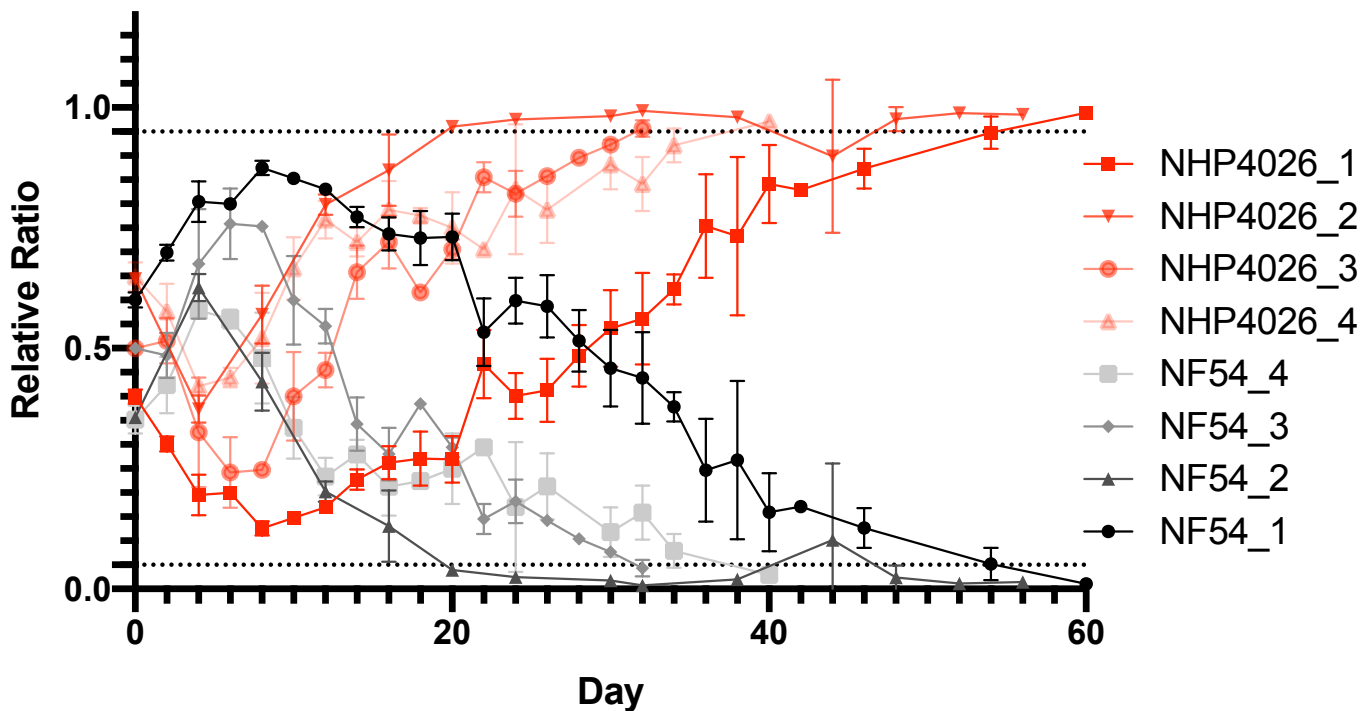

# B NHP4026 vs. NF54: means of biological replicates

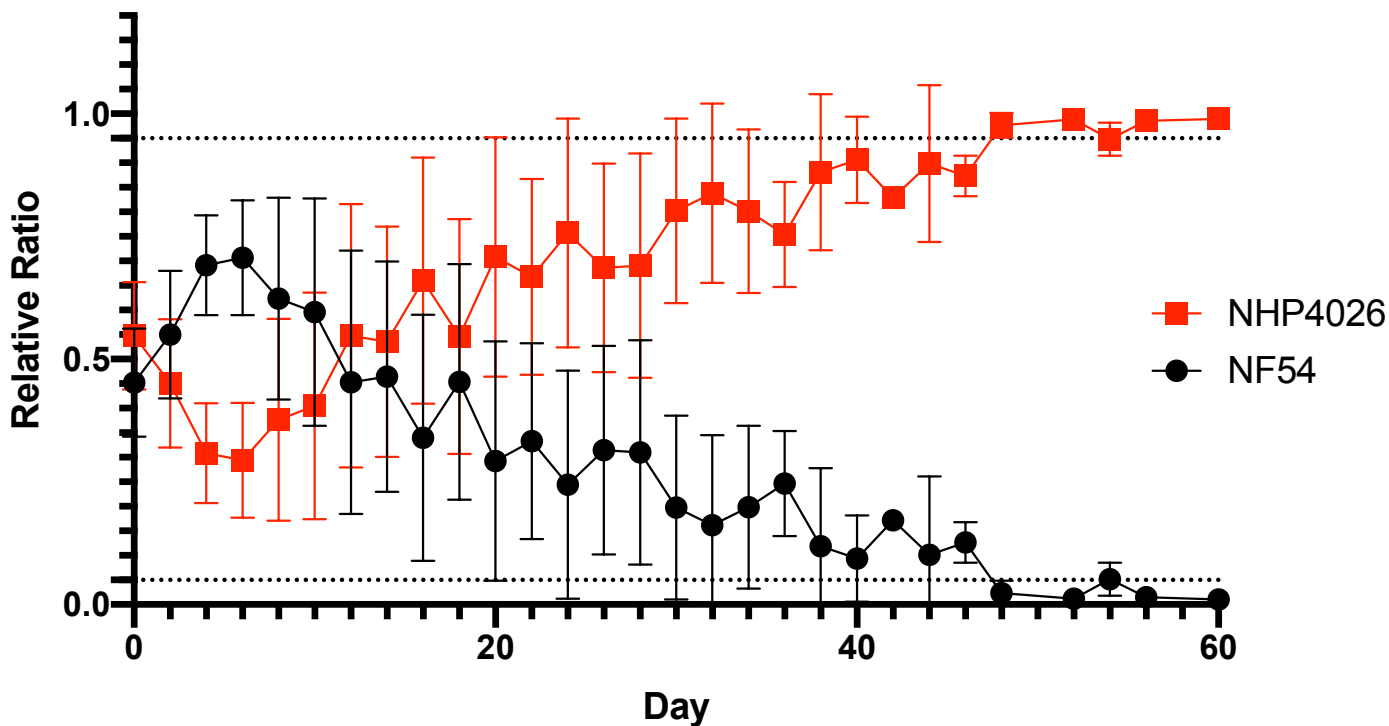

Supplement: MOESM3 [file 17111792]
