# Supplementary material for: Pairwise growth competitions identify relative fitness relationships among artemisinin resistant Plasmodium falciparum field isolates
Source: Springer Nature journal article supplement (doi:10.1186/s12936-019-2934-4), 2019-08-28

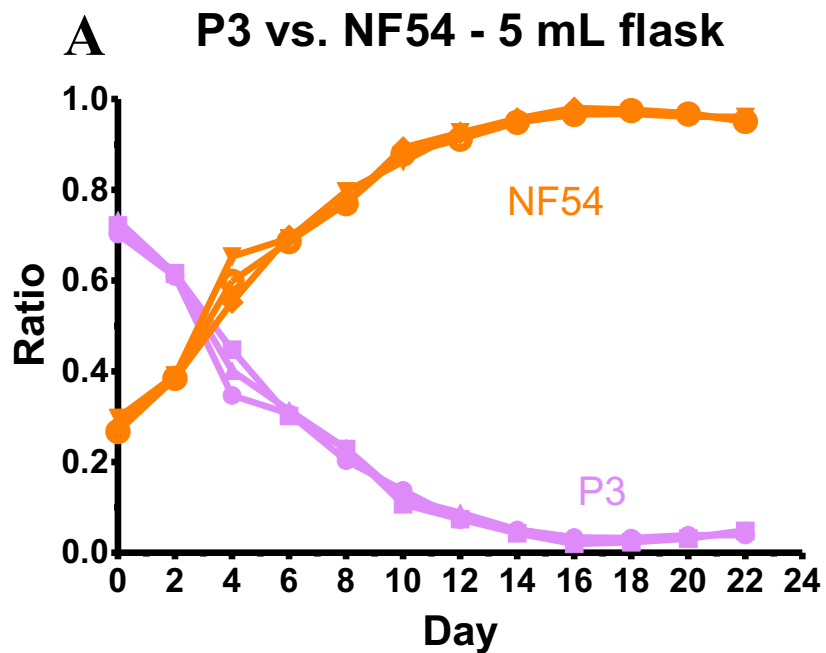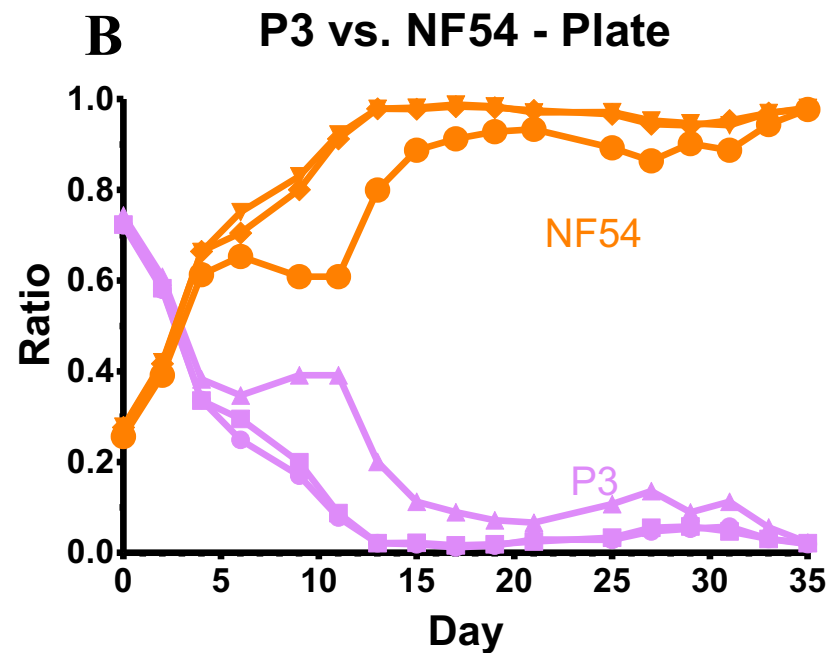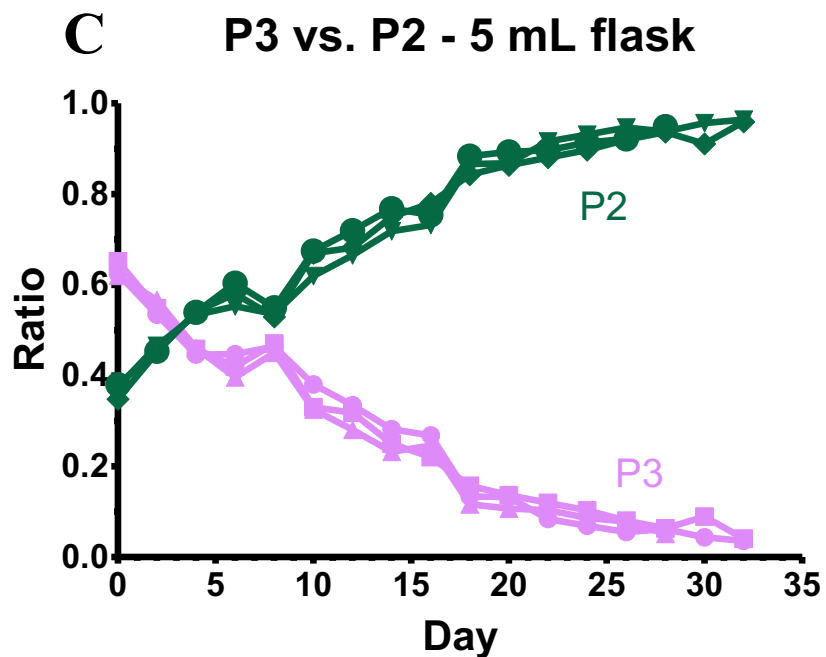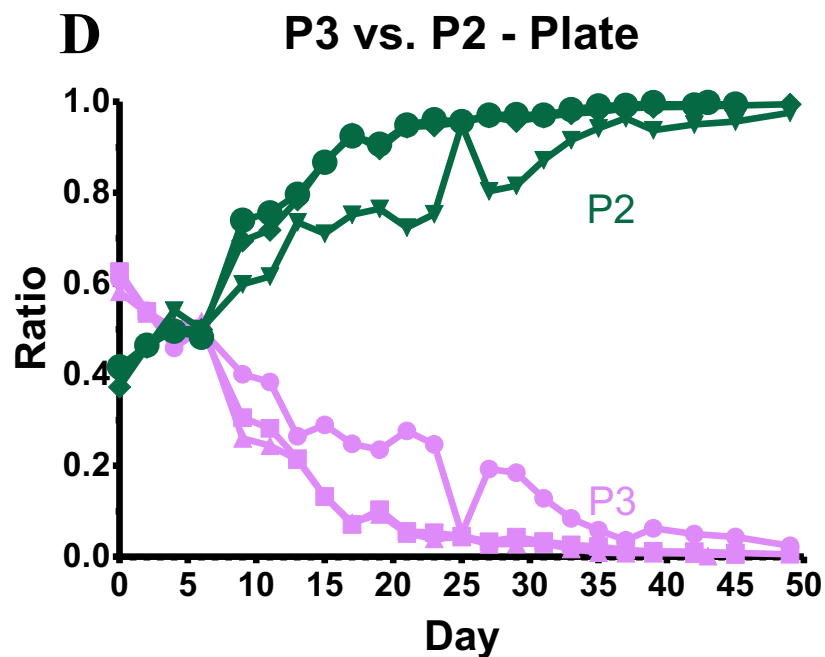

Supplement: MOESM5 [file 17111792]
